# Supplementary material for: Flexible and temperature-responsive hydrogel dressing for real-time and remote wound healing monitoring
Source: Royal Society of Chemistry journal article supplement (doi:10.1039/d3tb00099k), 2023-01-01
Supplement: d3tb00099k1.pdf [file d3tb00099k1.pdf]

## Supporting Information

### **Flexible and temperature-responsive hydrogel dressing for real-time and remote wound healing monitoring**

*Ji Jiang, <sup>#a</sup> Jie Ding, <sup>#a</sup> Xiaoyang Wu, <sup>a</sup> Mingze Zeng, <sup>a</sup> Yuan Tian, <sup>a</sup> Kai Wu, <sup>a</sup> Dan Wei, <sup>a</sup>  
Jing Sun, <sup>a</sup> Zhenzhen Guo <sup>\*b</sup>, Hongsong Fan <sup>\*a</sup>*

*<sup>a</sup> National Engineering Research Center for Biomaterials, College of Biomedical  
Engineering, Sichuan University, Chengdu 610064, Sichuan, P. R. China*

*<sup>b</sup> Department of Gastroenterology, Sichuan Provincial People's Hospital, University of  
Electronic Science and Technology of China, Chengdu, 610072, Sichuan, P. R. China*

\* Corresponding authors:

Hongsong Fan (E-mail: hsfan@scu.edu.cn)

Zhenzhen Guo (E-mail: zhenzhenguo0225@163.com)

# These authors contributed equally to this work

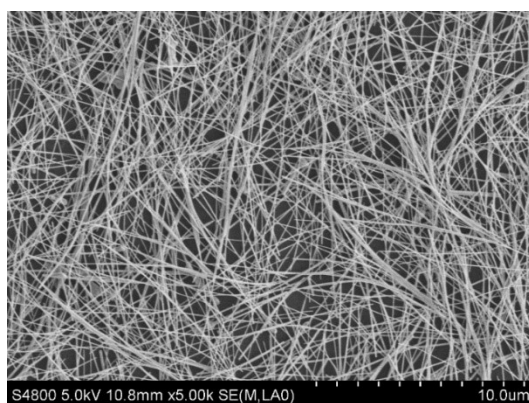

Fig. S1 Photograph of prepared AgNWs

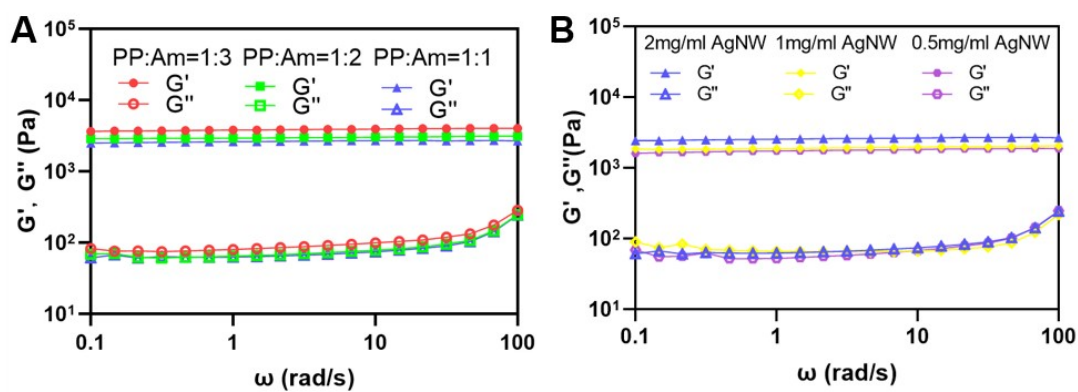

Fig. S2 (A) Frequency sweeps of PP hydrogels with different contents of PAM. (B) Frequency sweeps of PPA hydrogels with different contents of AgNWs.

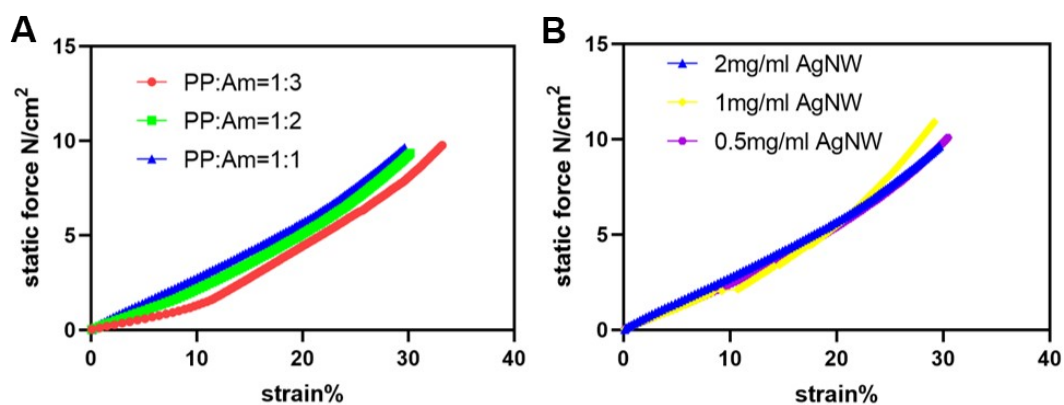

Fig. S3 (A) Strain-force curves of PP hydrogels with different contents of PAM. (B) Strain-force curves of PPA hydrogels with different contents of AgNWs.

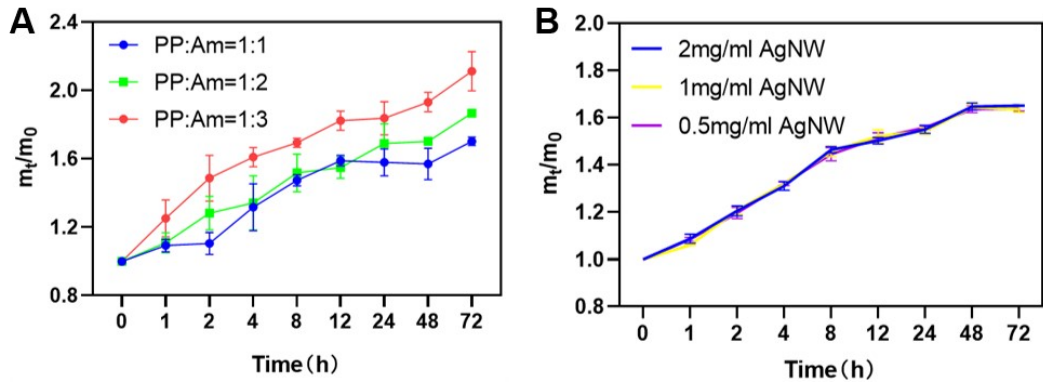

Fig. S4 (A) Swelling properties of PP hydrogels with different conctes of PAM. (B) Swelling properties of PPA hydrogels with different conctes of AgNWs.

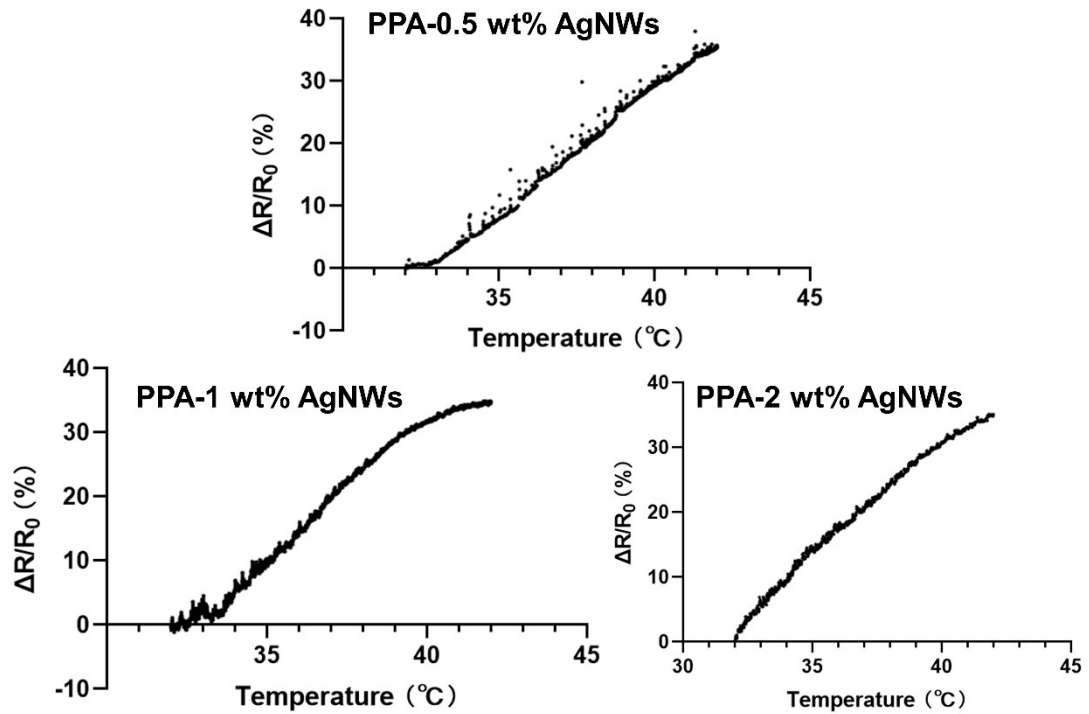

Fig. S5 Relative resistance change of PPA- AgNWs (0.5, 1 and 2 mg/mL) with the increase of temperature.

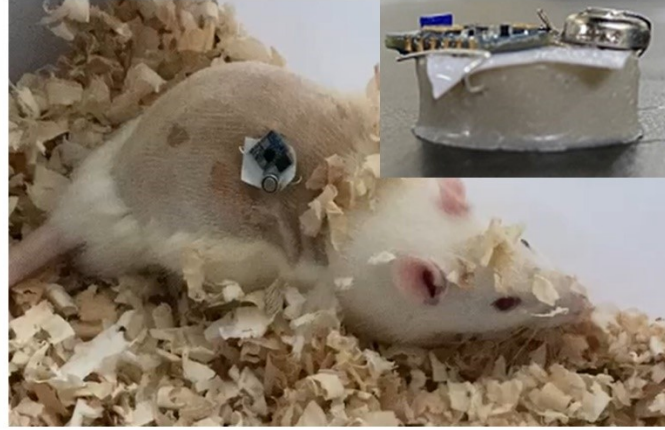

Fig. S6 Photographs of assembled PPA-Ag hydrogel matrix with real-time and remote monitoring module on a rat wound healing.

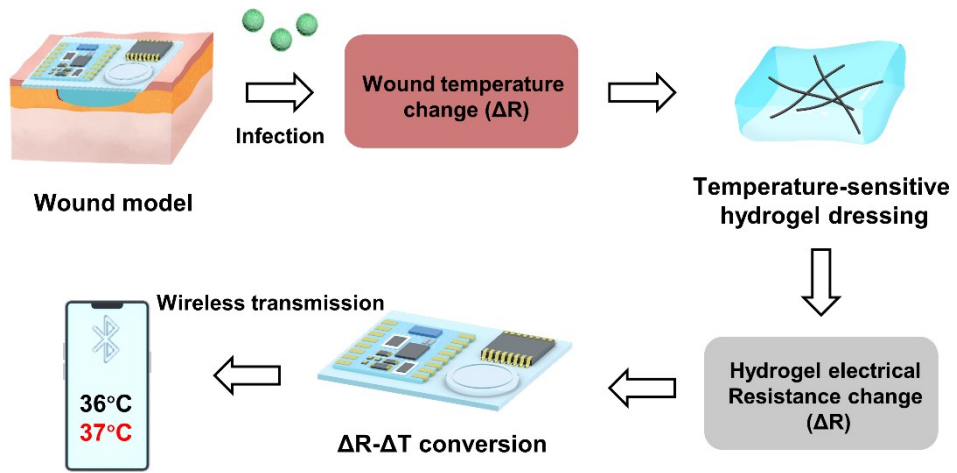

Fig. S7 Schematic of real-time and wireless monitoring of wound temperature by PPA-Ag hydrogel dressing

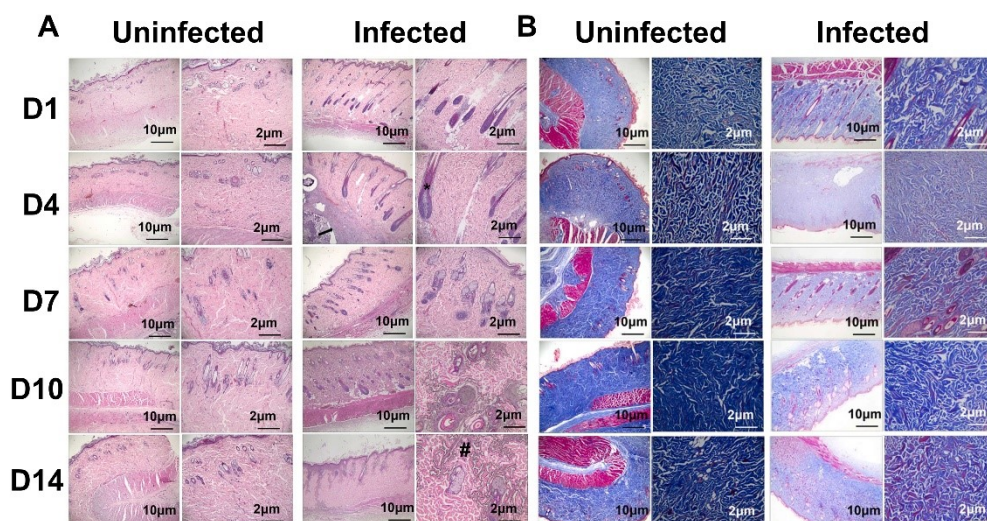

Fig. S8 (A) Histological analysis of the tissues of wounds by H&E staining on day 1, 3, 7, 10 and 14. (B) Histological analysis of the tissues of wounds by Masson's trichrome staining on day 1, 3, 7, 10 and 14.

Table S1. Composition of the PPA hydrogels

| Code  | PP (mg) | Am (mg) | MBA ( $\mu\text{L}$ ) | TEMED ( $\mu\text{L}$ ) | APS ( $\mu\text{L}$ ) |
|-------|---------|---------|-----------------------|-------------------------|-----------------------|
| PPA-1 | 25      | 25      | 15                    | 10                      | 10                    |
| PPA-2 | 17      | 33      | 15                    | 10                      | 10                    |
| PPA-3 | 12.5    | 37.5    | 15                    | 10                      | 10                    |

Table S2. Composition of the PPA-Ag hydrogels

| Code       | PP (mg) | Am (mg) | AgNWs (mg) | MBA ( $\mu\text{L}$ ) | TEMED ( $\mu\text{L}$ ) | APS ( $\mu\text{L}$ ) |
|------------|---------|---------|------------|-----------------------|-------------------------|-----------------------|
| PPA-Ag-0.5 | 17      | 33      | 0.25       | 15                    | 10                      | 10                    |
| PPA-Ag-1   | 17      | 33      | 0.5        | 15                    | 10                      | 10                    |
| PPA-Ag-2   | 17      | 33      | 0.75       | 15                    | 10                      | 10                    |
